# Supplementary material
Source: ML conference proceedings conference paper supplement (https://proceedings.neurips.cc/paper_files/paper/2011/hash/e5e63da79fcd2bebbd7cb8bf1c1d0274-Abstract.html)
Supplement: Supplementary file 1 [file e5e63da79fcd2bebbd7cb8bf1c1d0274-Supplemental.zip]

Archive with 1 entries (1 files):
- all/Paper 1083/Nips2011Messias_supplement.pdf
